# Supplementary material for: Safety, tolerability, pharmacokinetic, and pharmacodynamic characteristics of vutiglabridin: A first‐in‐class, first‐in‐human study
Source: PubMed Central journal article supplement — Clin Transl Sci. 2022 Oct 10;15(11):2744–57. doi: 10.1111/cts.13401 (PMC9652434; doi:10.1111/cts.13401), 2022-10-10
Supplement: CTS-15-2744-s002.pdf [file CTS-15-2744-s002.pdf]

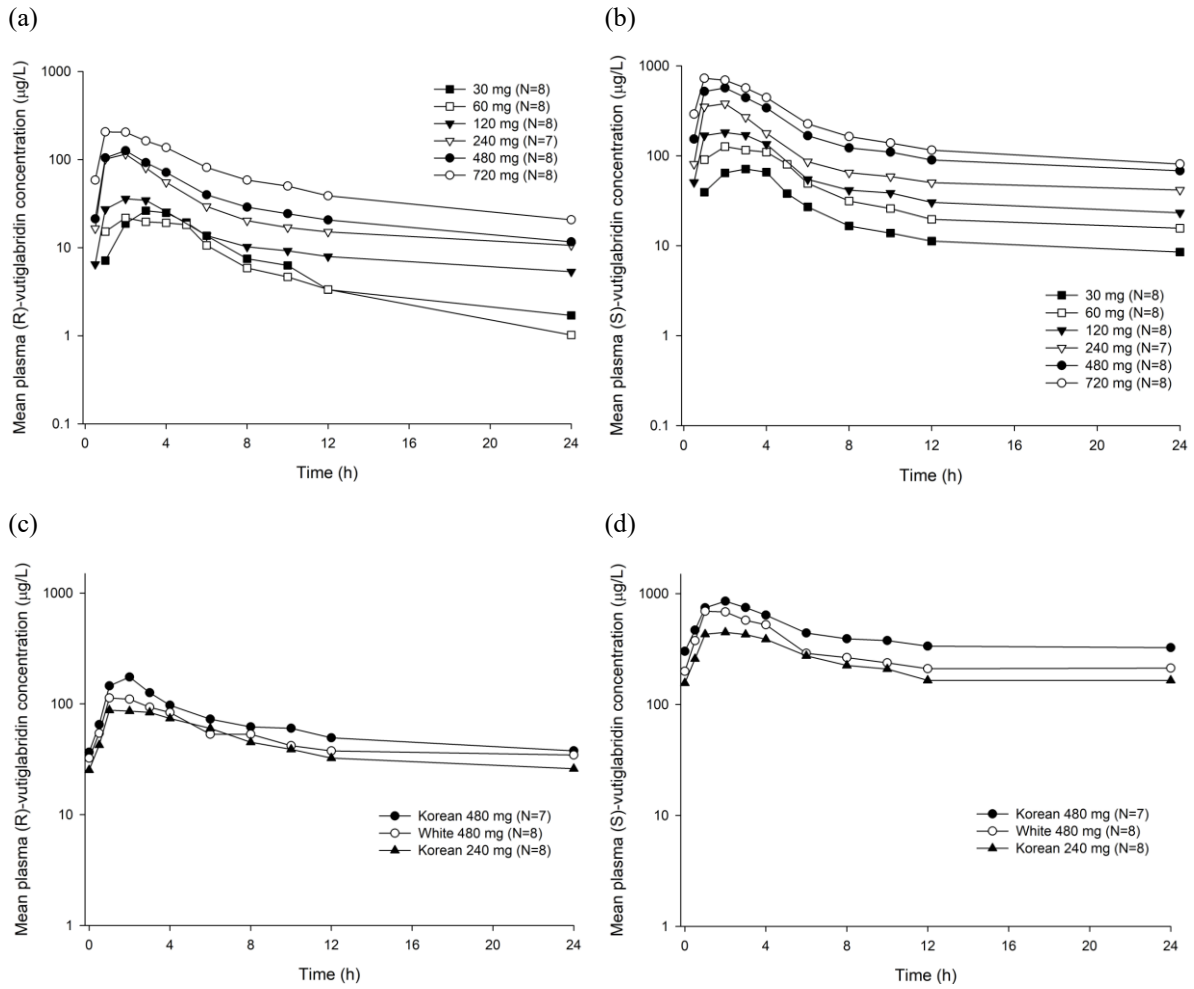

**Figure S1.** Mean plasma concentration-time profiles of (R)-, (S)-vutiglabinid after single and multiple oral administrations of vutiglabinid. The error bars represent the standard deviations. ((a) Plasma concentration of (R)-vutiglabinid after single dosing in single dose study (semi-log scale), (b) Plasma concentration of (S)-vutiglabinid after single dosing in single dose study (semi-log scale), (c) Plasma concentration of (R)-vutiglabinid after the last dosing in multiple dose study (semi-log scale), (d) Plasma concentration of (S)-vutiglabinid after the last dosing in multiple dose study (semi-log scale))

(a)

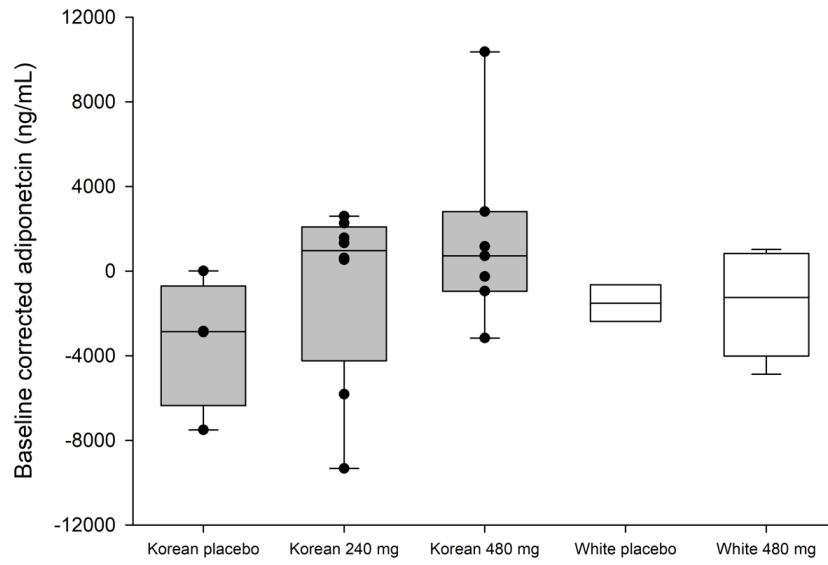

(b)

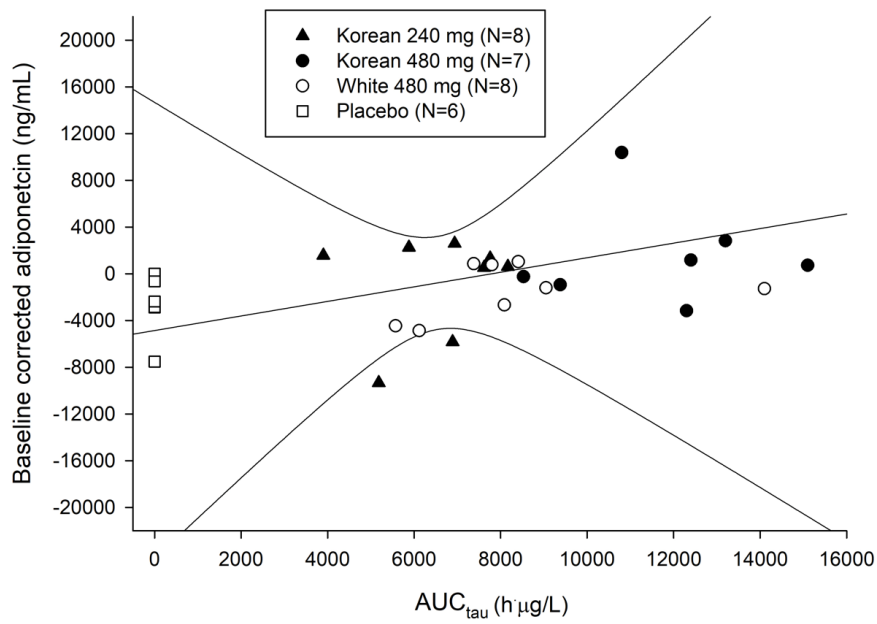

**Figure S2.** Dose–response (a) and exposure–response relationships of vutiglabridin (b) after multiple oral administrations in Korean and White subjects

(a)

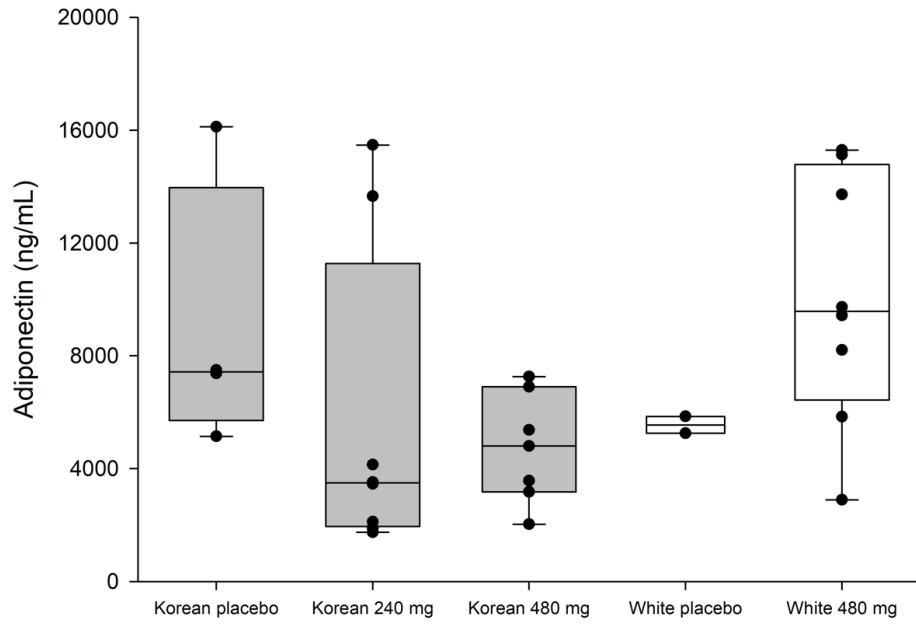

(b)

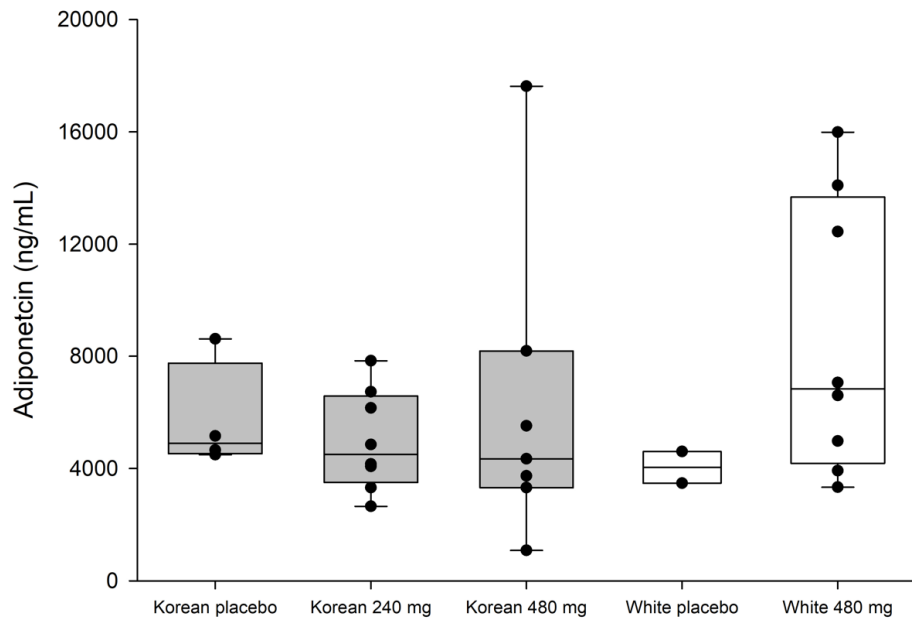

**Figure S3.** Adiponectin values (a) at baseline (b) after multiple oral administrations of vutiglabridin
